# Supplementary material for: BLOC1S1 control of vacuolar organelle fidelity modulates TH2 cell immunity and allergy susceptibility
Source: PubMed Central journal article supplement (PMC11722528; doi:10.1101/2024.03.21.586144), 2024-03-27
Supplement: media-1.pdf [file media-1.pdf]

1 **Supplementary Materials**

2 **TITLE**

3 BLOC1S1 control of vacuolar organelle fidelity modulates T<sub>H</sub>2 cell immunity and allergy  
4 susceptibility.

5

6 **AUTHORS**

7 Rahul Sharma<sup>1</sup>, Kaiyuan Wu<sup>2</sup>, Kim Han<sup>1</sup>, Anna Chiara Russo<sup>1</sup>, Pradeep K. Dagur<sup>3</sup>, Christian  
8 Combs<sup>4</sup>, Michael N. Sack<sup>1</sup>

9

10 **Suppl. Figure 1.** BLOC1S1 depleted CD4<sup>+</sup> T cells preferentially augments T<sub>H</sub>2 immune response.

11 **Suppl. Figure 2.** Increased Lamp1<sup>+</sup> Cells in BLOC1S1<sup>-/-</sup> CD4<sup>+</sup> T-cells.

12 **Suppl. Figure 3.** STING inhibition and its siRNA KD reduces IFN- $\gamma$  levels in CTRL and BLOC1S1  
13 <sup>-/-</sup> CD4<sup>+</sup> T-cells.

14 **Suppl. Figure 4.** TKO mice are more susceptible to drug induced dermatitis than CTRL mice.

15 **\*\*Suppl. Table 1.** List of primers used for qRT-PCR analysis.

16 **\*\*Suppl. Table 2.** List of antibodies used for immunofluorescence and immunoblotting.

17 **\*\*Suppl. Table 3.** List of FACS antibodies used and panel design for FACS analysis.

18 **\*\*Suppl. Table 4.** List of reagents used.

19

20

21

22

23

24

25

26

27

28

29

30

31

# Supplementary Figure 1

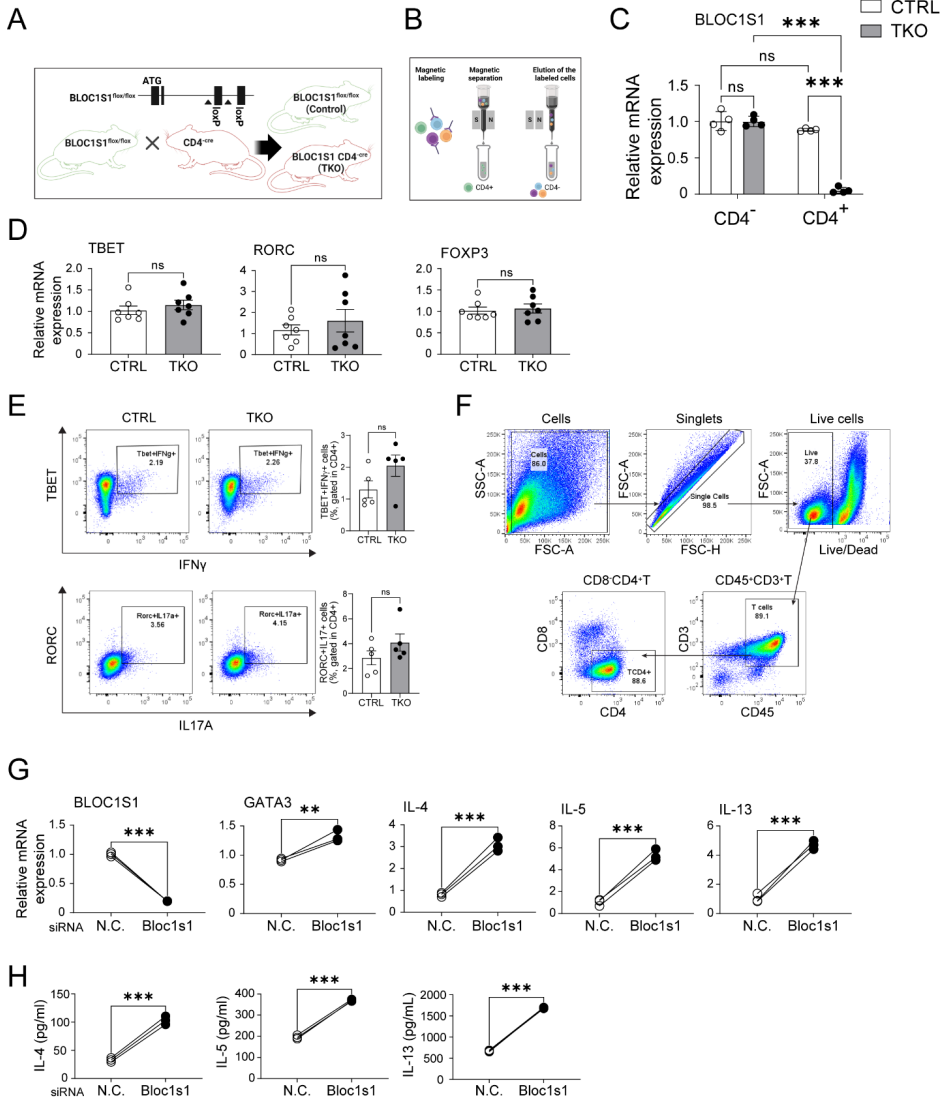

32

33

34

35 **Figure S1. BLOC1S1 depleted CD4<sup>+</sup> T cells preferentially augments T<sub>H</sub>2 immune response.**

36 **(A)** Schematic representation of approach to generate CD4<sup>+</sup> cell specific BLOC1S1 knockout  
37 (TKO) mouse. **(B)** Schematic representation of approach to separate CD4<sup>+</sup> T cells from the  
38 residual splenic pool (CD4<sup>-</sup> cells). **(C)** qRT-PCR showing relative mRNA expression levels of  
39 BLOC1S1 in CD4<sup>+</sup> and CD4<sup>-</sup> cells (n=4 group). **(D)** qRT-PCR showing relative mRNA  
40 expression levels of TBET, RORC and FOXP3 in CD4<sup>+</sup> T cells (n=7 per group). **(E)**  
41 Representative flow-cytometric analysis of intracellular cytokines TBET<sup>+</sup>IFN- $\gamma$ <sup>+</sup> and RORC<sup>+</sup>IL17<sup>+</sup>  
42 in CD4<sup>+</sup> T cells (n=5 per group). **(F)** Representative flow-cytometry gating profile of CD4<sup>+</sup> T cells  
43 for flow cytometry. **(G)** qRT-PCR showing relative mRNA expression levels of BLOC1S1,  
44 GATA3, IL-4, IL-5 and IL-13 in CD4<sup>+</sup> T cells isolated from blood of healthy individuals treated  
45 with either N.C. or siRNA (n=3 individuals). **(H)** IL-4, IL-5 and IL-13 cytokine release in activated  
46 CD4<sup>+</sup> T cells isolated from blood of healthy individuals (n=3 per group). Values represent mean  
47  $\pm$  SEM. \*p<0.05, \*\*p<0.01, \*\*\*p<0.001 vs. control mice using unpaired two-tailed student-t-test.  
48 FSC, forward scatter; SSC, side scatter.

49  
50  
51  
52  
53  
54  
55  
56  
57  
58  
59  
60  
61  
62  
63  
64  
65  
66  
67  
68

## Supplementary Figure 2

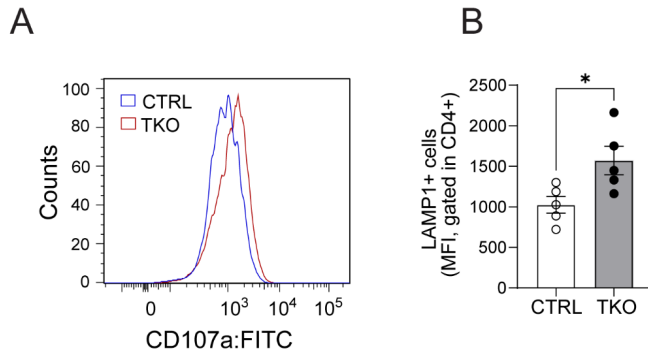

Commented [HKK(1)]: It's too big? Please adjust it with same size of other figures

69

70

71 **Figure S2. Increased Lamp1<sup>+</sup> Cells in BLOC1S1<sup>-/-</sup> CD4<sup>+</sup> T cells.**

72 **(A)** Intracellular staining of CTRL and TKO mouse CD4<sup>+</sup> T cells with CD107a (Lamp-1). **(B)**  
73 Histogram of Lamp-1<sup>+</sup> in CD4<sup>+</sup> T cells (n=5 per group). Values represent mean +/- standard  
74 error of mean (SEM). \*p<0.05, \*\*p<0.01, \*\*\*p<0.001 vs. CTRL by using unpaired two-tailed  
75 student-t-test.

76

77

78

79

80

81

82

83

84

85

### Supplementary Figure 3

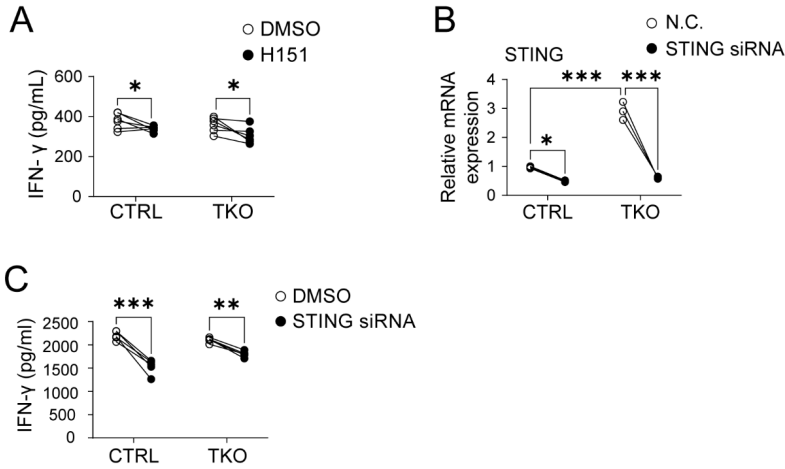

86

87

88 **Figure S3. STING inhibition and its siRNA KD reduces IFN-γ levels in CTRL and BLOC1S1<sup>-/-</sup> CD4<sup>+</sup> T cells.**

89  
 90 **(A)** IFN-γ cytokine release in CTRL and TKO CD4<sup>+</sup> T cells treated with either DMSO or H151  
 91 (500 nM) (n=6 per group). **(B)** qRT-PCR showing relative mRNA expression levels of STING in  
 92 CD<sup>+</sup> T cells of CTRL and TKO treated with either N.C. or STING siRNA (n=3 per group). **(C)**  
 93 IFN-γ cytokine release in CTRL and TKO CD4<sup>+</sup> T cells treated with either N.C. or STING siRNA  
 94 (n=6 per group). Values represent mean ± SEM. \*p<0.05, \*\*p<0.01, \*\*\*p<0.001 vs control mice  
 95 by two-way ANOVA followed by the Tukey's post hoc test or unpaired two-tailed student-t-test.

96

97

98

99

## Supplementary Figure 4

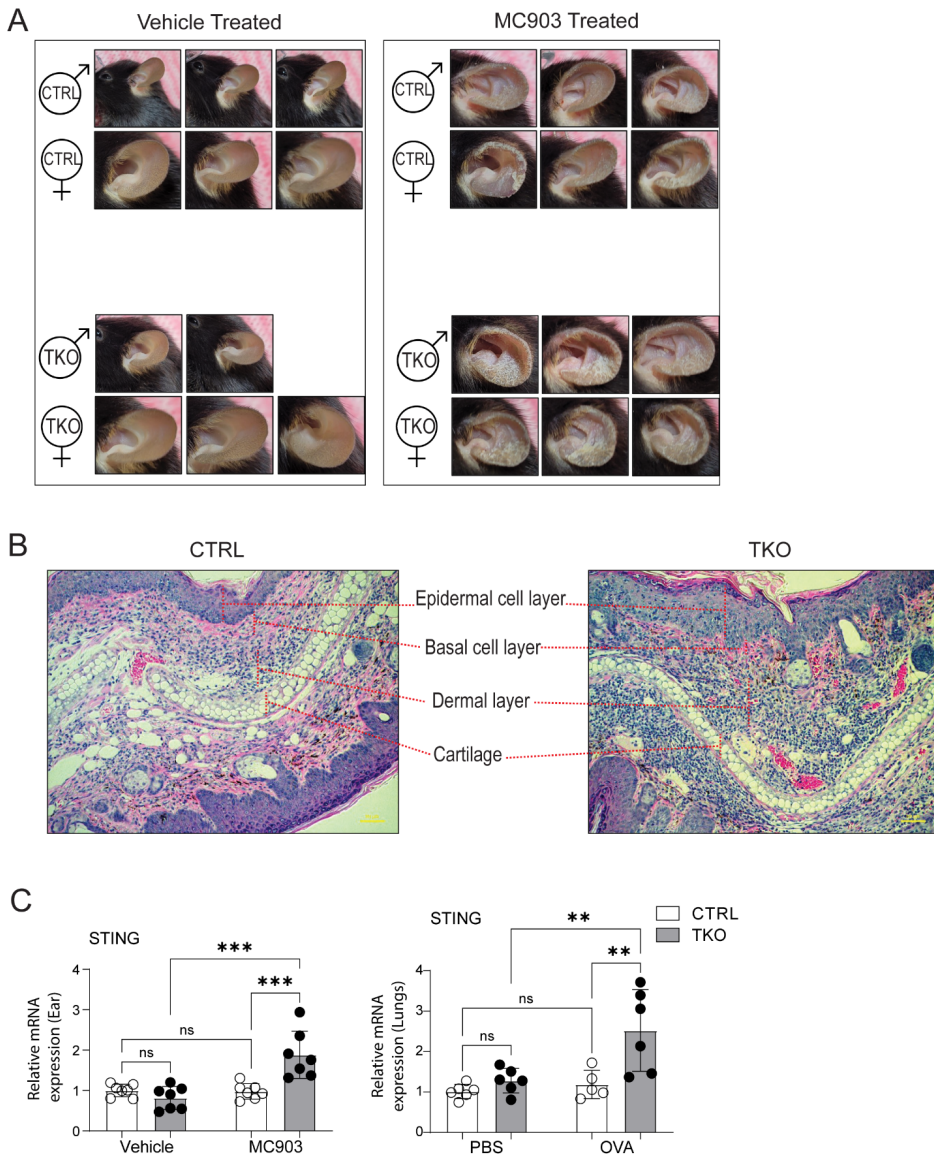

100

101

102 **Figure S4. TKO mice are more susceptible to drug induced dermatitis than CTRL mice.**

103 **(A)** Gross appearance of ears of mice treated with either ethanol or MC903 at day 12 in both  
104 sexes. **(B)** Relative H&E staining of MC903 treated CTRL and TKO mice ear sections at day 12.  
105 **(C)** qRT-PCR showing relative mRNA expression levels of STING in MC903 treated ear and  
106 OVA treated lungs (n=5-7 per group). Values represent mean  $\pm$  SEM. \*p<0.05, \*\*p<0.01,  
107 \*\*\*p<0.001 vs. control mice by two-way ANOVA followed by the Tukey's post hoc test or  
108 unpaired two-tailed student-t-test.

109

110

111

112

113

114

115

116

117

118

119

120

121

122

123

124

125

126

127

128

129

130

131

132

133

134 **Supplementary Table 1.**  
 135 Sequence of primers used for qRT-PCR studies.  
 136

Commented [HKK(2): Table line space and style looks different  
 As well as please use same style of table

| Name                           | Source                      | Oligonucleotides                                          |
|--------------------------------|-----------------------------|-----------------------------------------------------------|
| IL-4 (Mouse)                   | Integrated DNA Technologies | F: CAAACGTCCTCACAGCAACG<br>R: TGCAGCTCCATGAGAACACTAG      |
| IL-5 (Mouse)                   | Integrated DNA Technologies | F: AGCAATGAGACGATGAGGCTTC<br>R: CCCACGGACAGTTTGATTCTTCAG  |
| IL-13 (Mouse)                  | Integrated DNA Technologies | F: AAGATCTGTGTCTCTCCCTCTGAC<br>R: ATACCATGCTGCCGTTGCAC    |
| RNR2 (Mouse)                   | Integrated DNA Technologies | F: CTAGAAACCCCGAAACCAAA<br>R: CCAGCTATCACCAAGCTCGT        |
| D-Loop (Mouse)                 | Integrated DNA Technologies | F: AATCTACCATCCTCCGTGAAACC<br>R: TCAGTTTAGCTACCCCAAGTTTAA |
| TERT (Mouse)                   | Integrated DNA Technologies | F: CTAGCTCATGTGTCAAGACCCTCTT<br>R: GCCAGCACGTTTCTCTCGTT   |
| BLOC1S1 (Mouse)                | Integrated DNA Technologies | F: TCCCGCCTGCTCAAAGAAC<br>R: GAGGTGATCCACCAACGCTT         |
| FoxP3 (Mouse)                  | Integrated DNA Technologies | F: CACCCAGGAAAGACAGCAACC<br>R: GCAAGAGCTCTTGCCATTGA       |
| T-bet (Mouse)                  | Integrated DNA Technologies | F: TCAACCAGCACCAGAGAGAG<br>R: AAACATCCTGTAATGGCTTGTG      |
| Rorc (Mouse) QuantiTech Primer | Qiagen                      | Cat. QT00197722                                           |
| 18S (Mouse) QuantiTech Primer  | Qiagen                      | Cat. QT02448075                                           |



|                                   |                             |                                                       |
|-----------------------------------|-----------------------------|-------------------------------------------------------|
| 16S (Mouse)                       | Integrated DNA Technologies | F: CTAGAAACCCCGAAACCAA<br>R: TCAGTTTAGCTACCCCAAGTTTAA |
| IL-4 (Human) QuantiTech Primer    | Qiagen                      | Cat. QT00012565                                       |
| IL-5 (Human) QuantiTech Primer    | Qiagen                      | Cat. QT00001435                                       |
| IL-13 (human)                     | Qiagen                      | Cat. QT00000511                                       |
| GATA3 (Human)                     | Integrated DNA Technologies | F: GAACCGGCCCTCATTAAAG<br>R: ATTTTTCGGTTTCTGGTCTGGAT  |
| BLOC1S1 (Human) QuantiTech Primer | Qiagen                      | Cat. QT0016002                                        |
| 18S (Human) QuantiTech Primer     | Qiagen                      | Cat. QT00199367                                       |

137  
138  
139  
140  
141  
142  
143  
144  
145  
146  
147  
148  
149  
150  
151

152 **Supplementary Table 2.**

153

| <b>Antibodies used for immunoblotting and Immunofluorescence</b> |                  |                         |                |
|------------------------------------------------------------------|------------------|-------------------------|----------------|
| <b>Antibody</b>                                                  | <b>Catalog #</b> | <b>Working dilution</b> | <b>Source</b>  |
| Ki67 (D3B5)                                                      | 9129S            | 1:400 (IF)              | Cell Signaling |
| P-IKB-alpha (Ser32) (14D4)                                       | 2859S            | 1:1000 (IB)             | Cell Signaling |
| IKB-alpha                                                        | 9242S            | 1:1000 (IB)             | Cell Signaling |
| P-NFkB P65 (Ser536) (93H1)                                       | 3033S            | 1:1000 (IB)             | Cell Signaling |
| NFkB P65 (D14E12)                                                | 8242S            | 1:1000 (IB)             | Cell Signaling |
| P-STAT6 (Tyr641) (D8S9Y)                                         | 56554S           | 1:1000 (IB)             | Cell Signaling |
| STAT6 (D3H4)                                                     | 5397S            | 1:1000 (IB)             | Cell Signaling |
| GATA3 (D13C9)                                                    | 5852S            | 1:1000 (IB)             | Cell Signaling |
| $\beta$ -actin (8H10D10)                                         | 3700S            | 1:1000 (IB)             | Cell Signaling |
| Total Oxphos                                                     | Ab110413         | 1:1000 (IB)             | Abcam          |
| cGAS (D3080)                                                     | 31659S           | 1:1000 (IB)             | Cell Signaling |
| P-STING (Ser365) (D8F4W)                                         | 72971S           | 1:1000 (IB)             | Cell Signaling |
| STING (D2P2F)                                                    | 13647S           | 1:1000 (IB), 1:200 (IF) | Cell Signaling |
| P-TBK1 (Ser172) (D52C2)                                          | 5483S            | 1:1000 (IB)             | Cell Signaling |
| TBK1 (E813G)                                                     | 38066S           | 1:1000 (IB)             | Cell Signaling |
| Tom20 (F-10)                                                     | SC-17764         | 1:1000 (IB), 1:200 (IF) | Santa Cruz     |
| VDAC (D73D12)                                                    | 4661S            | 1:1000 (IB)             | Cell Signaling |
| Lamp1 (ab208943)                                                 | Ab208943         | 1:1000 (IB), 1:200 (IF) | Abcam          |
| LC3 AB (D3U4C)                                                   | 12741S           | 1:1000 (IB), 1:200 (IF) | Cell Signaling |
| dsDNA (HYB331-01)                                                | SC-58749         | 1:200 (IF)              | Santa Cruz     |
| Lamp1 (H4A3)                                                     | SC-20011         | 1:1000 (IB), 1:200 (IF) | Santa Cruz     |

154

155

156

157

158

159

160

161

162

163

164

165

166

167

168 **Supplementary Table 3.**

169 Antibody panel design for flow cytometry.

| Target    | Version                             | Catalog#   | Vendor       |
|-----------|-------------------------------------|------------|--------------|
| CD4       | BUV 395                             | 563790     | BD           |
| CD3       | BUV496                              | 741117     | BD           |
| IFN-g     | BUV737                              | 612769     | BD           |
| CD45      | BUV805                              | 568336     | BD           |
| LIVE_DEAD | BV421                               | 423114     | BIOLEGEND    |
| TNF-a     | BV510                               | 506339     | BIOLEGEND    |
| CD8       | BV605                               | 563152     | BD           |
| RORGT     | BV650                               | 564722     | BD           |
| IL-4      | BV711                               | 504133     | BIOLEGEND    |
| IL-17A    | BV786                               | 564171     | BD           |
| CD107A    | FITC                                | 121606     | BIOLEGEND    |
| CD27      | PERCPCY5.5                          | 563603     | BD           |
| IL-13     | PE                                  | 568551     | BD           |
| TBET      | PECF594                             | 562467     | BD           |
| MHC-II    | PECY7                               | 107630     | BIOLEGEND    |
| FOXP3     | APC                                 | 567462     | BD           |
| GATA3     | APC-700                             | 567633     | BD           |
| CD44      | APCCY7                              | 103028     | BIOLEGEND    |
|           | FOXP3<br>BUFFER                     | 00-5523-00 | E BIOSCIENCE |
|           | leukocyte<br>activation<br>cocktail | 550583     | BD           |

170

171

172 **Supplementary Table 4.**

173 List of reagents.

174

| <b>Reagent</b>                   | <b>Catalog number</b> | <b>Source</b>     |
|----------------------------------|-----------------------|-------------------|
| CyQuant Cell Proliferation Assay | C7026                 | Invitrogen        |
| Pierce BCA Protein Assay         | 23227                 | Thermo Scientific |
| Human IL-4 DuoSet ELISA Kit      | DY204                 | R&D Systems       |
| Human IL-5 DuoSet ELISA Kit      | DY205                 | R&D Systems       |
| Human IL-13 DuoSet ELISA Kit     | DY213                 | R&D Systems       |
| Mouse IFN-gamma DuoSet ELISA Kit | DY485                 | R&D Systems       |
| Mouse TNF-alpha DuoSet ELISA Kit | DY410                 | R&D Systems       |
| Mouse IL-4 DuoSet ELISA Kit      | DY404                 | R&D Systems       |
| Mouse IL-5 DuoSet ELISA Kit      | DY405                 | R&D Systems       |
| Mouse IL-13 DuoSet ELISA Kit     | DY413                 | R&D Systems       |
| Mouse IL-10 DuoSet ELISA Kit     | DY417                 | R&D Systems       |
| Mouse IL-17 DuoSet ELISA Kit     | DY421                 | R&D Systems       |
| Lymphocyte Separation Medium     | 0850494               | MP Biomedicals    |

|                                          |                  |                    |
|------------------------------------------|------------------|--------------------|
| Human CD4+ T Cell Isolation Kit          | 130-096-533      | Miltenyi Biotec    |
| NucleoSpin RNA Kit                       | 740955           | Macherey-Nagel     |
| First-strand Synthesis SuperMix          | 11752250         | Invitrogen         |
| FastStart Essential DNA Green Master Mix | 06924204001      | Roche Life Science |
| Accell siRNA delivery media              | B-005000-100     | Horizon Discovery  |
| H151                                     | HY-112693        | MedChemExpress     |
| JSH-23                                   | HY-13982         | MedChemExpress     |
| Rapamycin                                | HY-10219         | MedChemExpress     |
| SMARTpool: Accell BLOC1S1                | E-012580-00-0020 | Dharmacon          |
| SMARTpool: Accell Tmem173                | E-055528-00-0020 | Dharmacon          |
| CD3 (Mouse)                              | 100339           | Biolegend          |
| CD28 (Mouse)                             | 102116           | Biolegend          |

175

176

177
